# Supplementary material
Source: PubMed Central journal article supplement (PMC4211370)
Supplement: cdd201483x1.pdf [file cdd201483x1.pdf]

### **Supplementary Figure legends**

**Supplementary Fig.1: HCC development in NEMO<sup>LPC-KO</sup> mice depends on death receptor-independent FADD signaling.** Macroscopic images of livers from NEMO<sup>LPC-KO</sup>, NEMO<sup>LPC-KO</sup>/3DR<sup>LPC-KO</sup> and NEMO<sup>LPC-KO</sup>/FADD<sup>LPC-KO</sup> mice at the age of 1 year.

**Supplementary Fig.2: TNF or death receptor deficiency does not prevent biliary-epithelial-cell / oval-cell dysplasia in NEMO<sup>LPC-KO</sup> mice.**

A) Liver sections of 8-week-old mice with the indicated genotypes were stained for Cytokeratin 19 (TROMA-III antibody). B-D) Quantification of CK19 (B) cleaved caspase-3 (C) and Ki-67 positive hepatocytes (D) in livers from mice with the indicated genotypes. Each dot represents the average number of positive cells per mouse, counted on 5 randomly selected fields of a liver section under 200x magnification.

**Supplementary Fig.3: Depletion of NK cells does not prevent apoptosis, hepatocyte proliferation, oval cell expansion and cytokine expression in NEMO<sup>LPC-KO</sup> mice.**

A) Liver sections of PBS- or anti-AsialoGM1 antibody-treated mice stained for cleaved caspase-3, Ki-67 and CK19, B) qRT-PCR expression analysis of RNA isolated from liver tissue of NEMO<sup>LPC-KO</sup> mice treated with PBS or anti-AsialoGM1 antibody.

**NEMO<sup>LPC-KO</sup>**

**NEMO<sup>LPC-KO</sup>/  
3DR<sup>LPC-KO</sup>**

**NEMO<sup>LPC-KO</sup>/  
FADD<sup>LPC-KO</sup>**

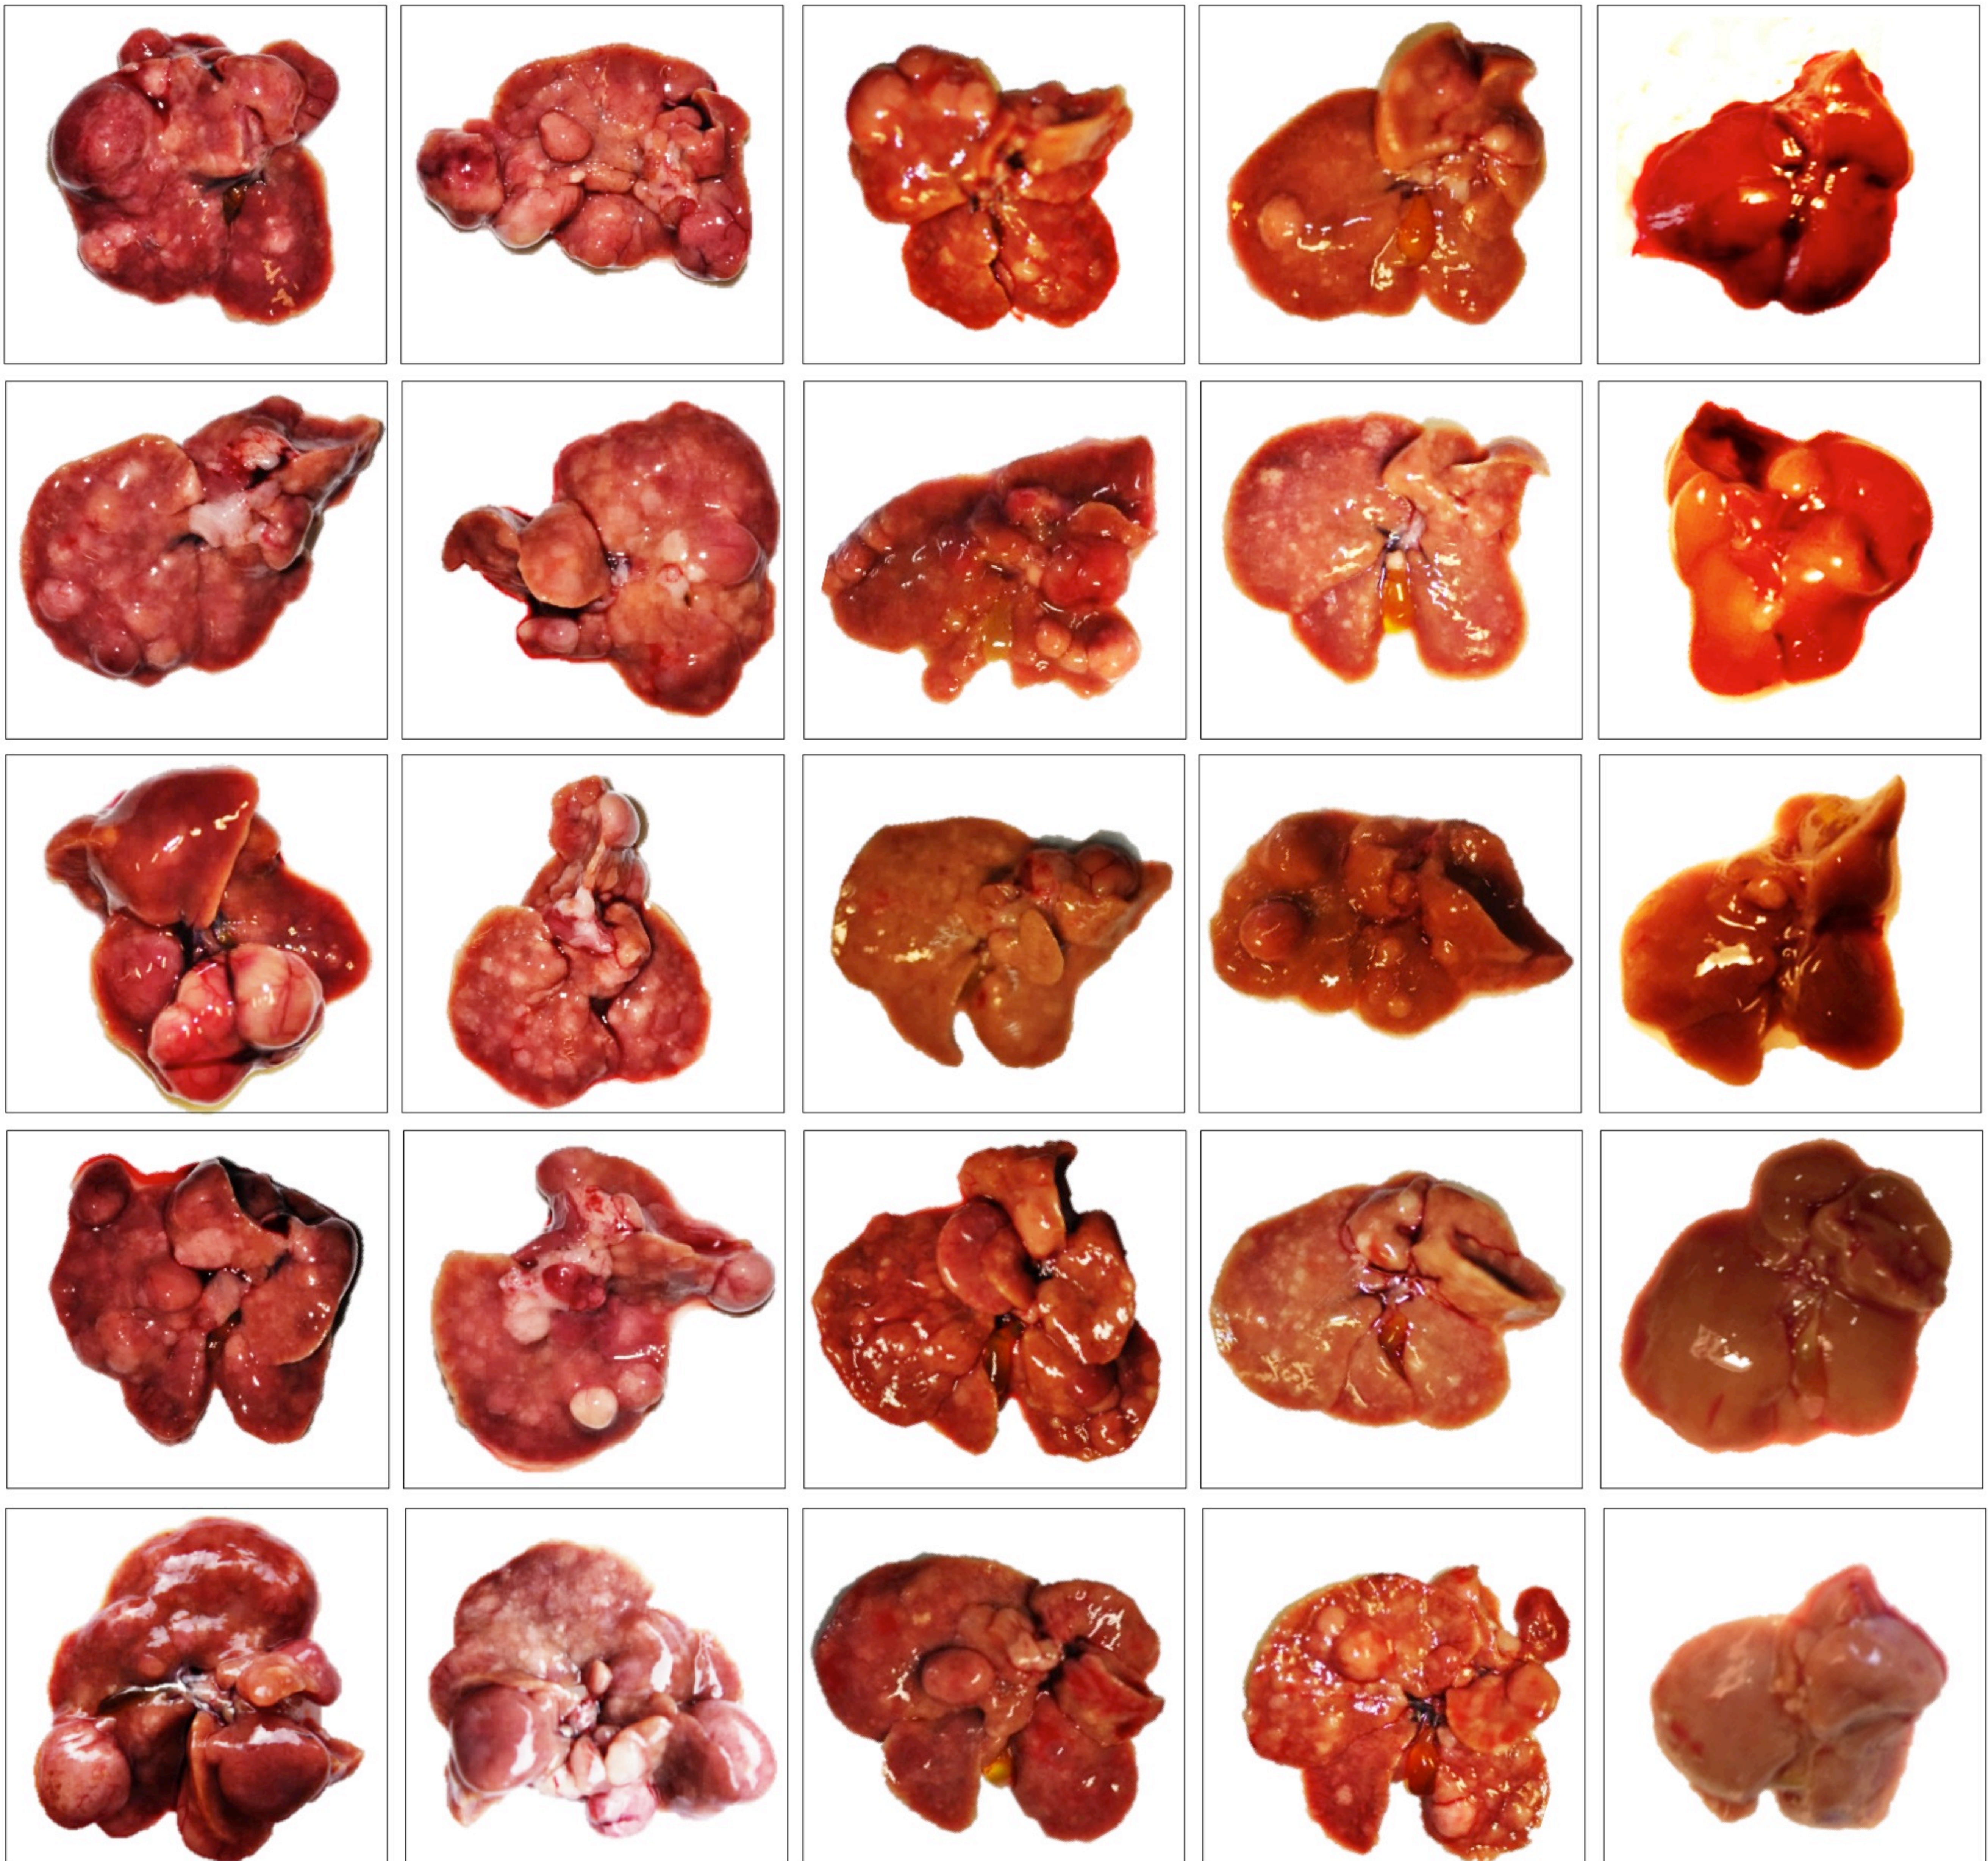

**Figure S1**

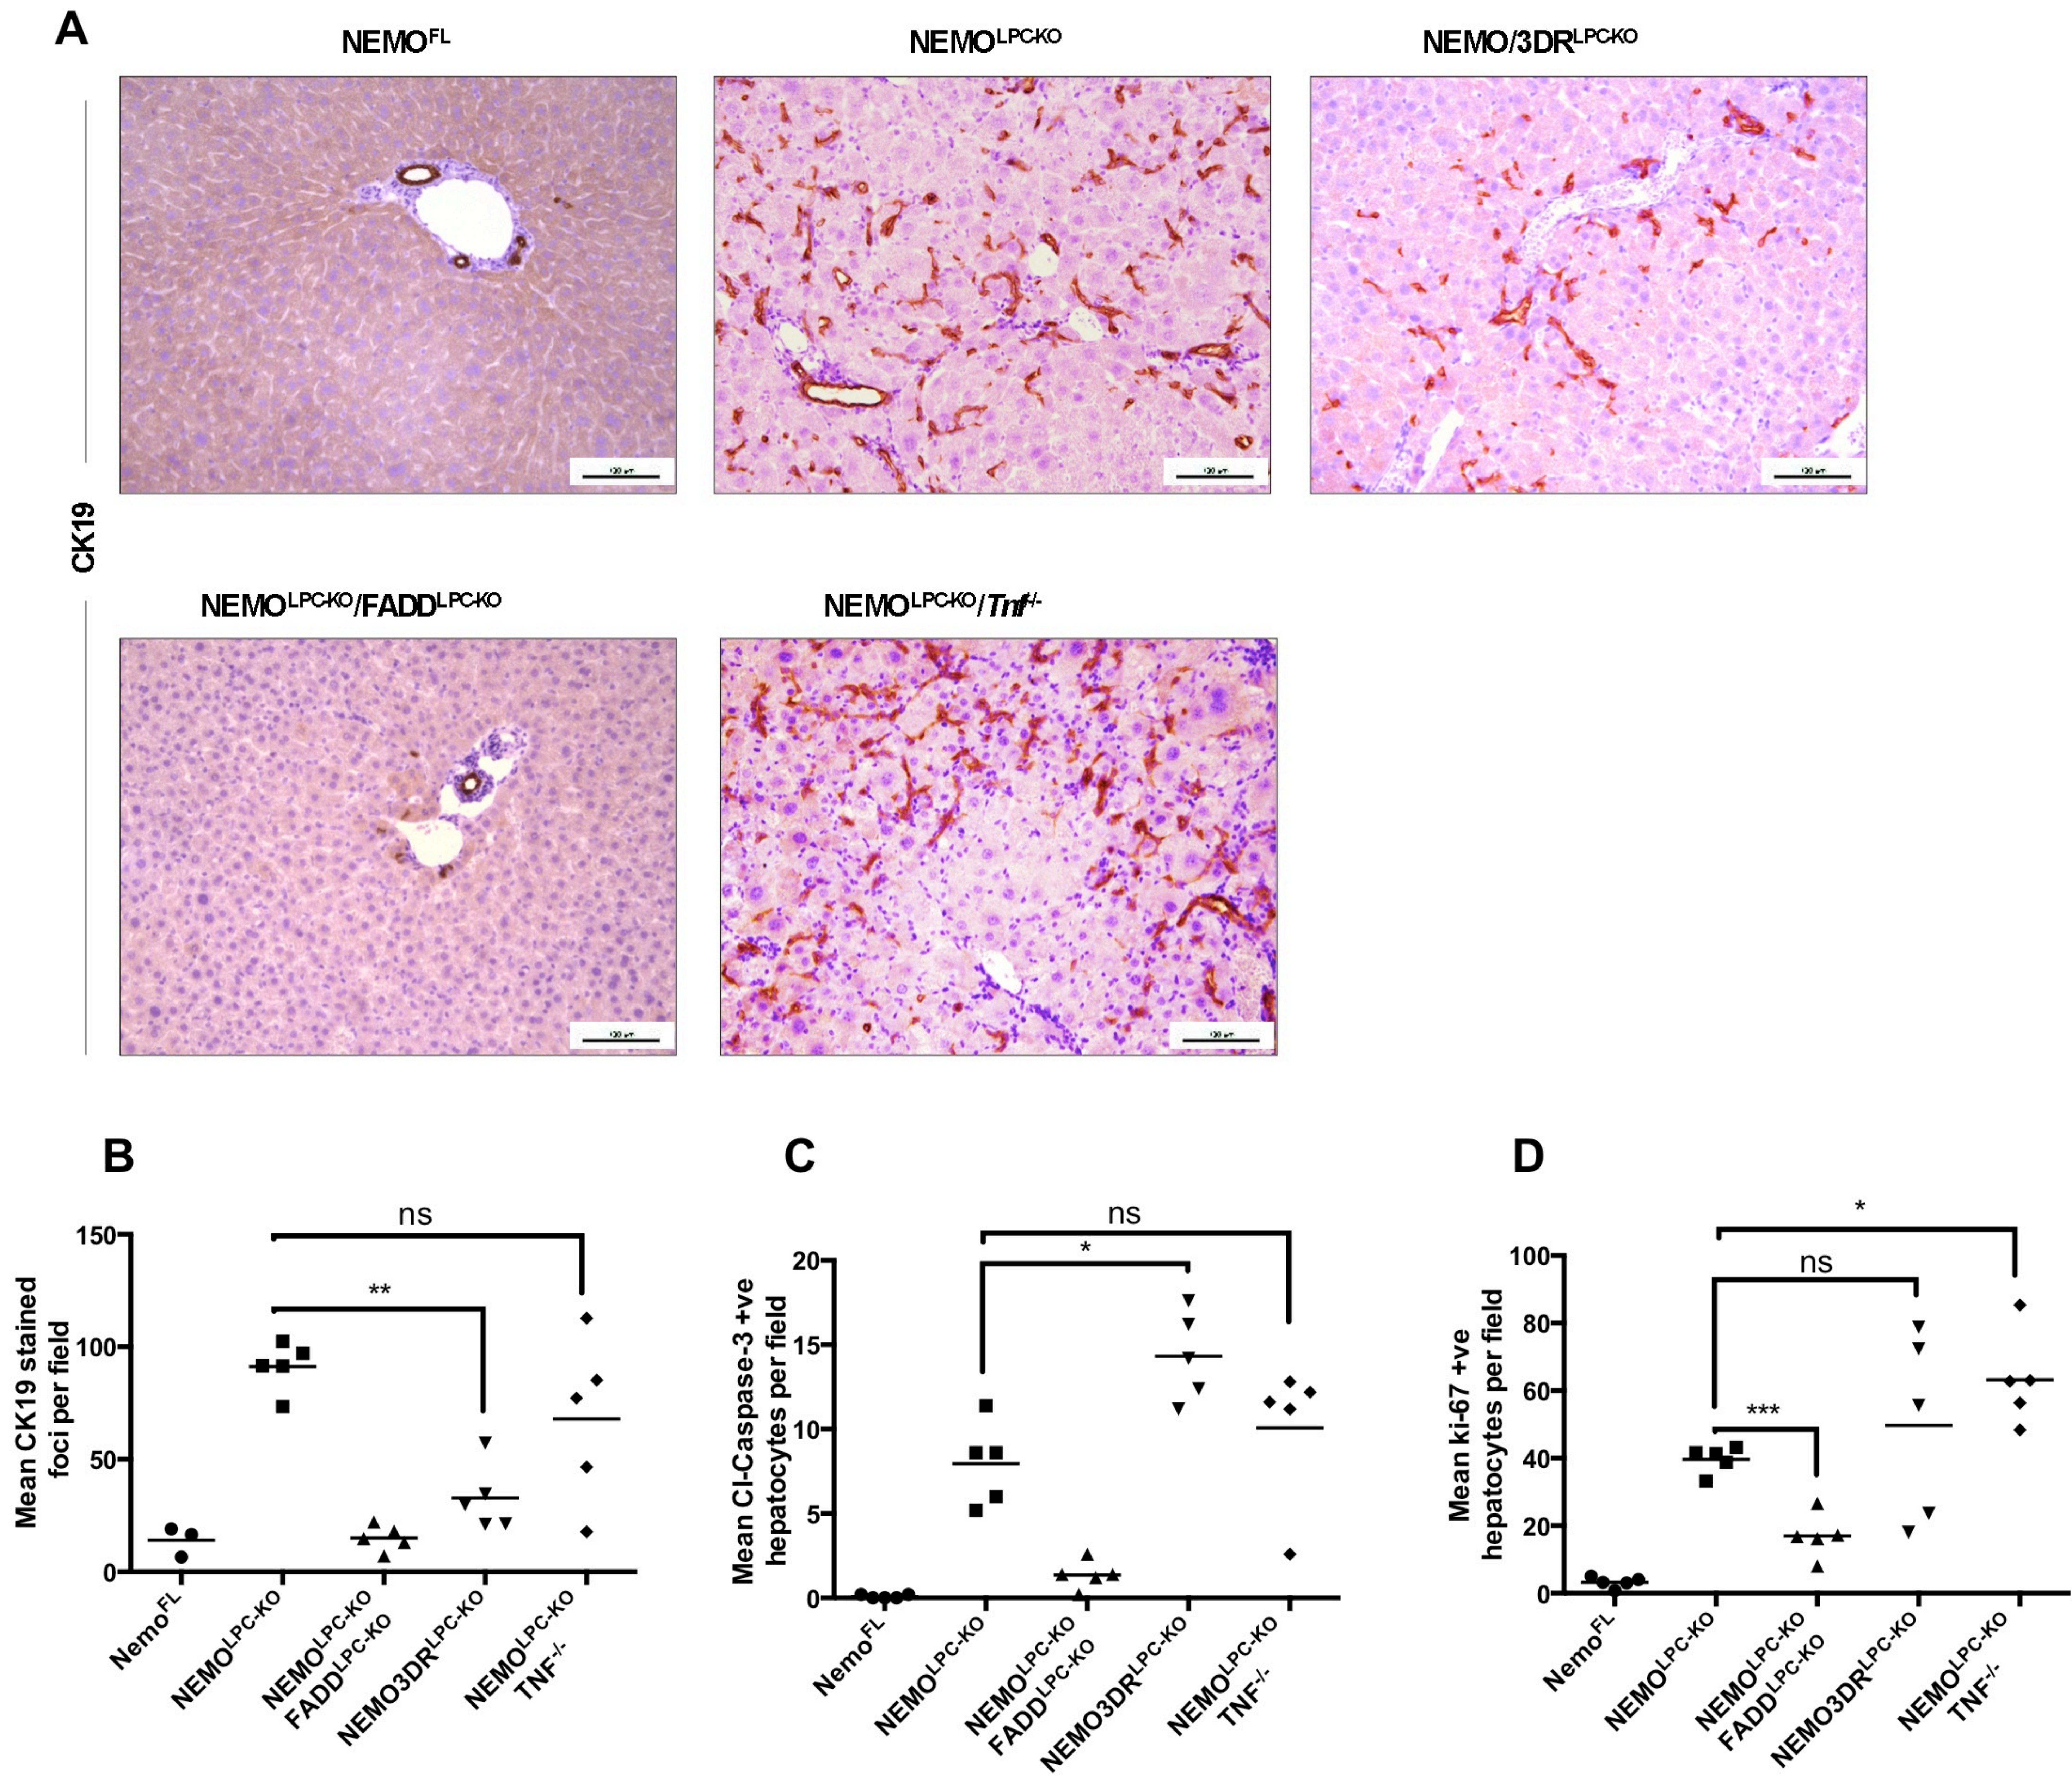

Figure S2

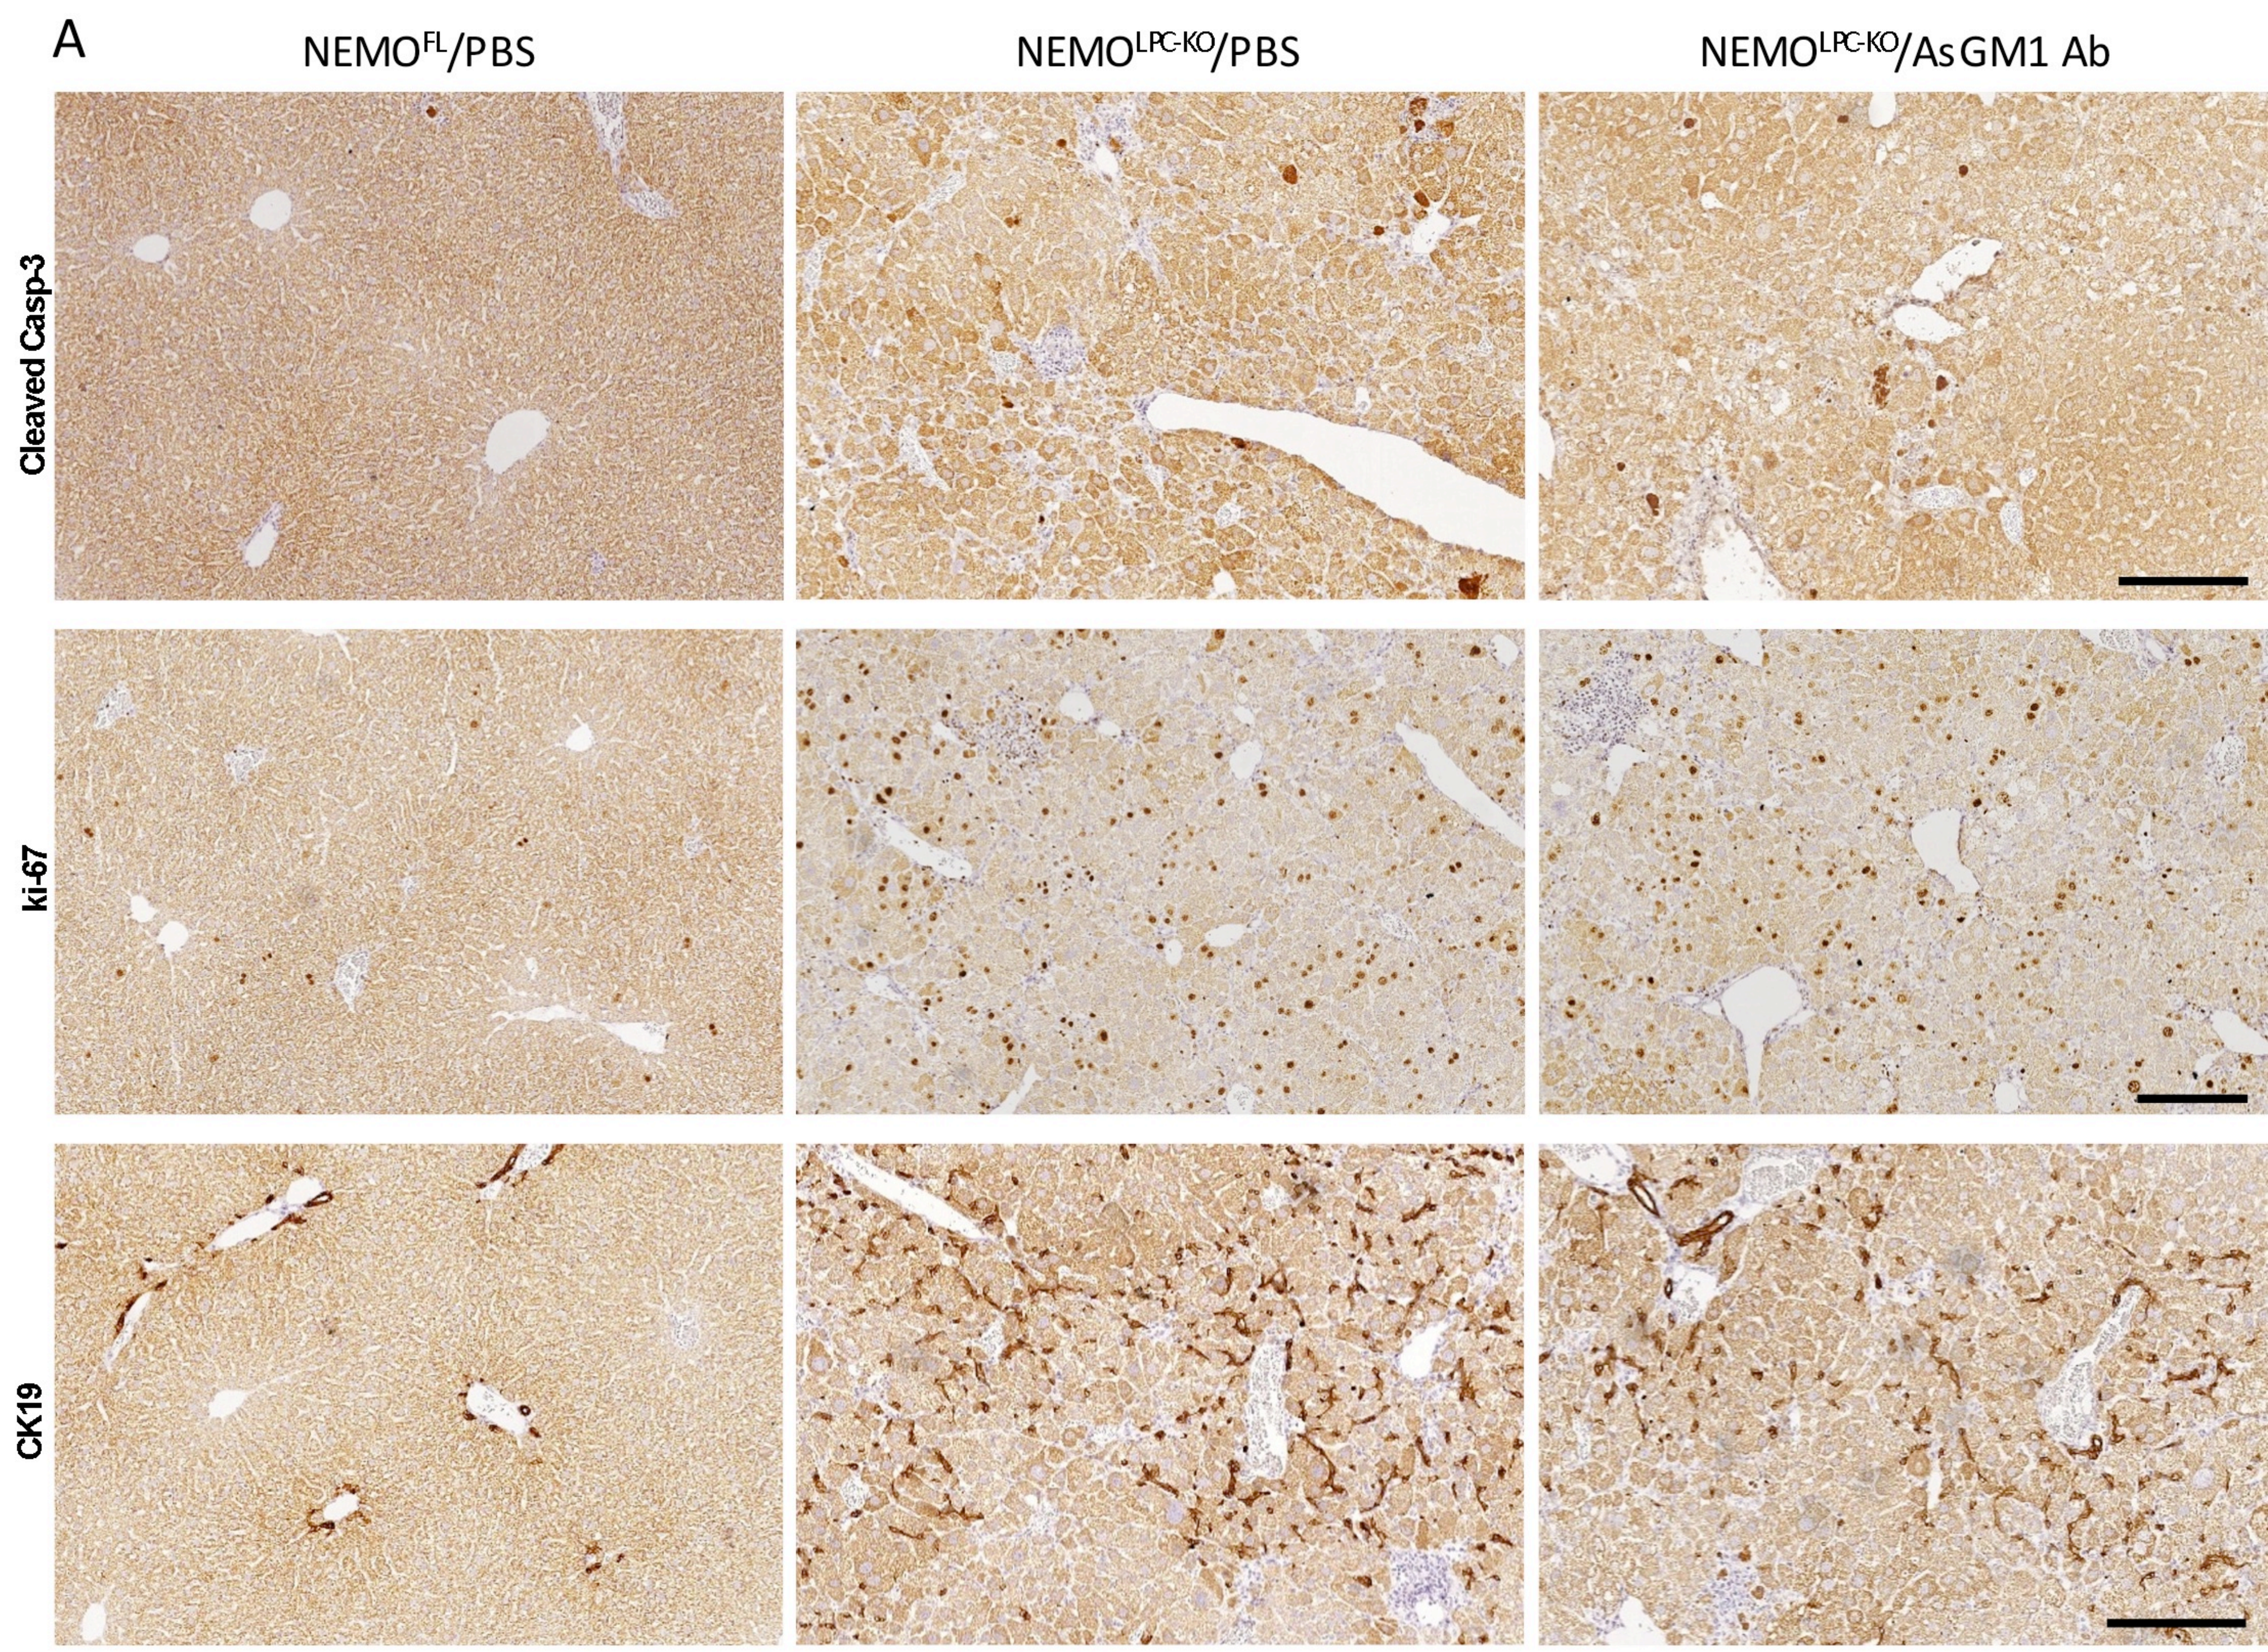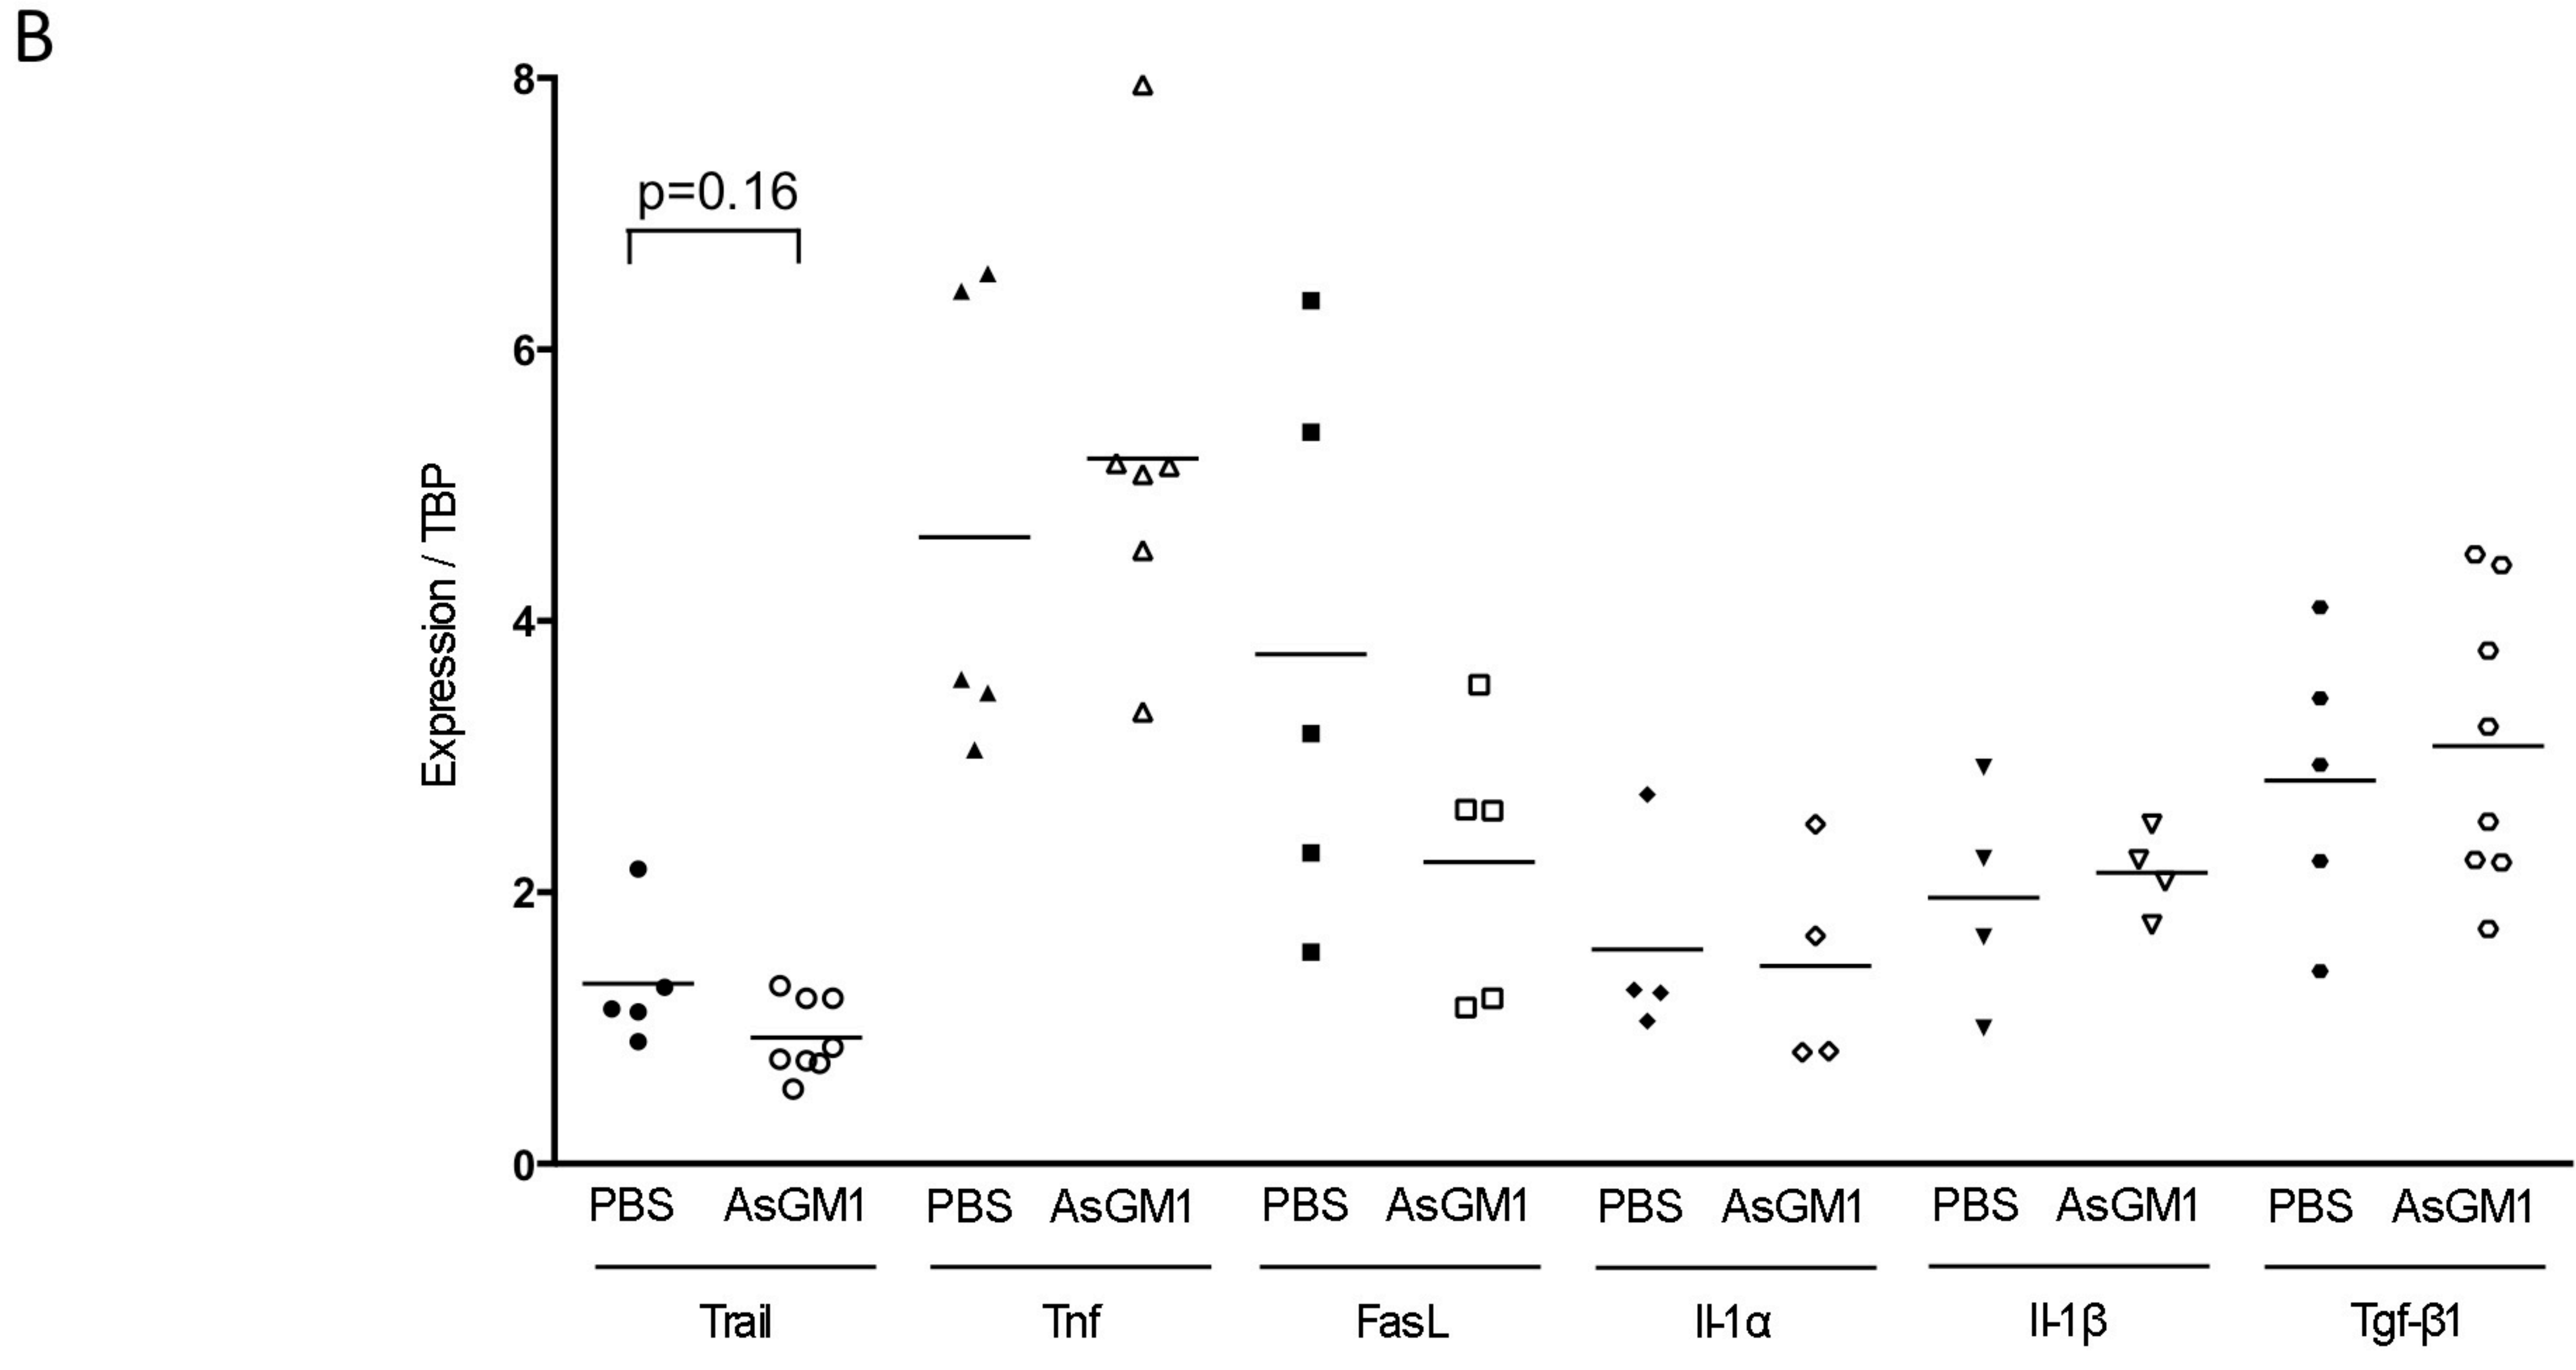

**Figure S3**
